# THE JOURNAL OF NEUROPSYCHIATRY and Clinical Neurosciences

The Official Journal of the American Neuropsychiatric Association

## In this issue:

- Systematic Review of Neuroimaging Correlates of Executive Functioning: Converging Evidence From Different Clinical Populations
- Long-Term Neuropsychological Safety of Subgenual Cingulate Gyrus Deep Brain Stimulation for Treatment-Resistant Depression
- Functional Magnetic Resonance Imaging Study of Apathy in Alzheimer's Disease
- Hippocampal and Subcortical Alterations of First-Episode, Medication-Naïve Major Depressive Disorder With Panic Disorder Patients

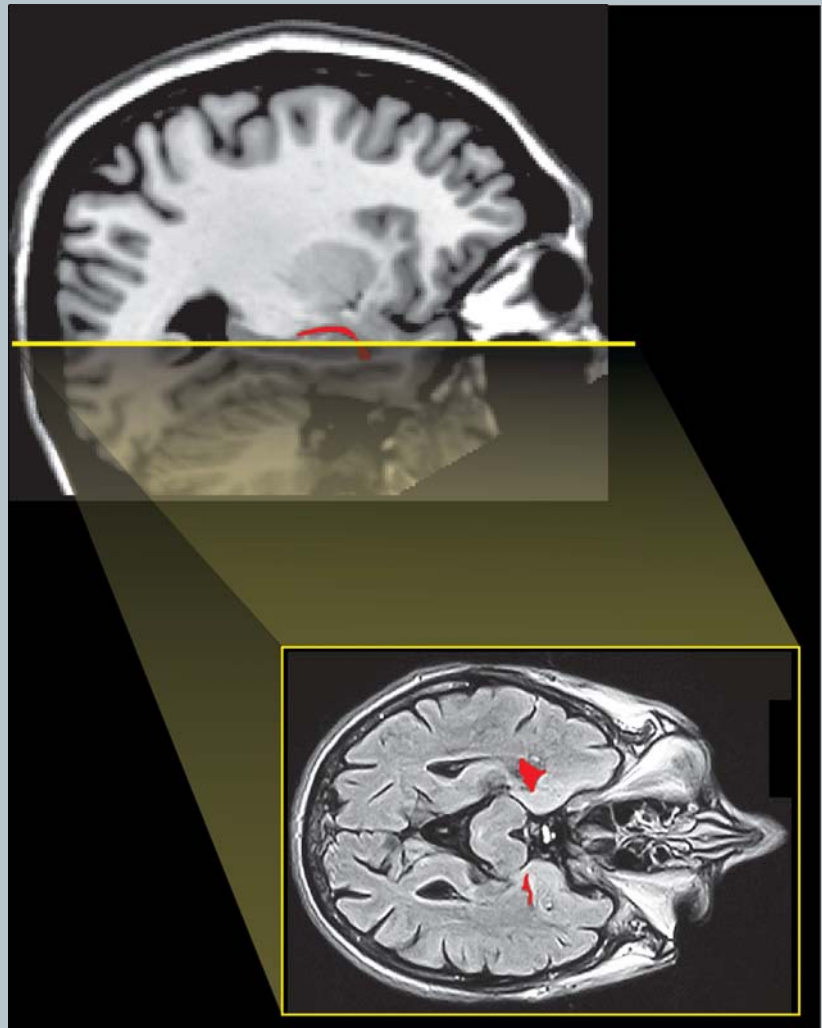

Source: https://psychiatryonline.org/doi/suppl/10.1176/jnp.2014.26.issue-2/suppl_file/cover.pdf
